# Supplementary material
Source: MDPI journal article supplement (https://www.mdpi.com/1999-4907/14/6/1197)
Supplement: s1 [file s1]

## Supplementary Materials

**Table S1.** The results of Duncan's multiple comparison test and *t*-tests for SOC (g kg<sup>-1</sup>) in homogeneous regions.

| Zone                     | 0–20 cm         | 20–40 cm       | 40–60 cm        | 60–80 cm     | 80–100 cm   |
|--------------------------|-----------------|----------------|-----------------|--------------|-------------|
| Forest types             | **              | ***            | *               | ns           | ns          |
| Broad-leaved             | 23.52 ± 12.67 a | 16.06 ± 8.81 a | 12.25 ± 7.57 ab | 10.11 ± 6.72 | 9.29 ± 6.75 |
| Coniferous               | 21.42 ± 10.99 b | 13.16 ± 7.65 c | 10.49 ± 6.70 b  | 9.23 ± 6.37  | 8.93 ± 6.48 |
| Mixed forest             | 22.13 ± 11.79 a | 14.43 ± 9.43 b | 11.51 ± 9.18 a  | 9.57 ± 7.71  | 8.80 ± 7.40 |
| Upper texture (0–40 cm)  | ***             | ***            | -               | -            | -           |
| Clay                     | 22.01 ± 15.82   | 15.33 ± 11.24  | -               | -            | -           |
| Sandy loam               | 21.84 ± 11.40   | 14.81 ± 8.22   | -               | -            | -           |
| Deep texture (40–100 cm) | -               | -              | ***             | ***          | ***         |
| Clay                     | -               | -              | 12.19 ± 9.41    | 9.94 ± 7.85  | 9.40 ± 7.55 |
| Clay loam                | -               | -              | 11.54 ± 7.64    | 9.92 ± 6.84  | 9.18 ± 6.77 |

Note: Data are presented as means ± standard deviations. \*  $p < 0.05$ , \*\*  $p < 0.01$ , \*\*\*  $p < 0.001$ , ns = not significant. Lowercase letters indicate significant differences between treatments ( $p < 0.05$ ).

**Table S2.** The ensemble coefficients of each soil layer.

| Soil Layer (cm) | Formula                                   |
|-----------------|-------------------------------------------|
| 0–20            | $f_{final} = 1/2 f_f + 1/2 f_t$           |
| 20–40           | $f_{final} = 1/2 f_f + 1/2 f_t$           |
| 40–60           | $f_{final} = 1/2 f_f + 1/2 f_t$           |
| 60–80           | $f_{final} = 1/2 f_f + 1/2 f_t$           |
| 80–100          | $f_{final} = 1/3 f_f + 1/3 f_t + 1/3 f_g$ |

Note: See section 2.4. *Mapping Method* for definitions of  $f_t$ ,  $f_i$  and  $f_g$ .
